# Supplementary material for: Myocardin regulates mitochondrial calcium homeostasis and prevents permeability transition
Source: PubMed Central journal article supplement — Cell Death Differ. 2018 Mar 6;25(10):1732–48. doi: 10.1038/s41418-018-0073-z (PMC6180099; doi:10.1038/s41418-018-0073-z), 2018-03-06
Supplement: 41418_2018_73_MOESM4_ESM.pdf [file 41418_2018_73_MOESM4_ESM.pdf]

| <b>Gene Symbol</b> | <b>Fold Difference</b> |
|--------------------|------------------------|
| Abl1               | 0.83                   |
| Akt1               | 1.06                   |
| Apaf1              | 1.07                   |
| App                | 0.82                   |
| Atg12              | 0.90                   |
| Atg16l1            | 0.99                   |
| Atg3               | 0.88                   |
| Atg5               | 0.88                   |
| Atg7               | 0.74                   |
| Atp6v1g2           | 0.92                   |
| Bax                | 1.02                   |
| Bcl2               | 0.87                   |
| Bcl2l1             | 0.68                   |
| Bcl2l11            | 1.47                   |
| Becn1              | 0.92                   |
| Birc2              | 1.04                   |
| Bmf                | 0.94                   |
| Casp1              | 1.11                   |
| Casp2              | 1.10                   |
| Casp3              | 0.84                   |
| Casp6              | 0.90                   |
| Casp7              | 0.71                   |
| Casp9              | 0.88                   |
| Cflar              | 0.96                   |
| Commd4             | 0.95                   |
| Ctsb               | 0.90                   |
| Ctss               | 0.80                   |
| Cyld               | 1.11                   |
| Dffa               | 3.23                   |
| Esr1               | 0.77                   |
| Fas                | 0.97                   |
| Faslg              | 1.00                   |
| Gaa                | 0.74                   |
| Gadd45a            | 0.80                   |
| Galnt5             | 0.69                   |
| Grb2               | 0.94                   |
| Hspbap1            | 0.90                   |
| Htt                | 1.00                   |
| Igf1               | 0.75                   |
| Igf1r              | 0.99                   |
| Irgm               | 2.24                   |
| Map11c3a           | 0.84                   |
| Mapk8              | 0.86                   |

|            |      |
|------------|------|
| Mcl1       | 1.06 |
| Nfkb1      | 1.00 |
| Nol3       | 0.93 |
| Parp1      | 0.97 |
| Parp2      | 1.01 |
| Pik3c3     | 1.15 |
| Pten       | 0.90 |
| Pvr        | 1.15 |
| Rab25      | 2.45 |
| RGD1311517 | 0.68 |
| Dennd4a    | 0.85 |
| Rps6kb1    | 1.05 |
| Spata2     | 0.93 |
| Sqstm1     | 0.86 |
| Tnfrsf10b  | 1.09 |
| Tnfrsf11b  | 0.77 |
| Tnfrsf1a   | 1.01 |
| Tnfrsf8    | 1.23 |
| Tp53       | 0.99 |
| Traf2      | 0.92 |
| Txn14b     | 0.84 |
| Ulk1       | 0.72 |
| Xiap       | 0.93 |
