# Supplementary figures and images for: Myocardin regulates mitochondrial calcium homeostasis and prevents permeability transition
Source: PubMed Central journal article supplement — Cell Death Differ. 2018 Mar 6;25(10):1732–48. doi: 10.1038/s41418-018-0073-z (PMC6180099; doi:10.1038/s41418-018-0073-z), 2018-03-06

Figure S1

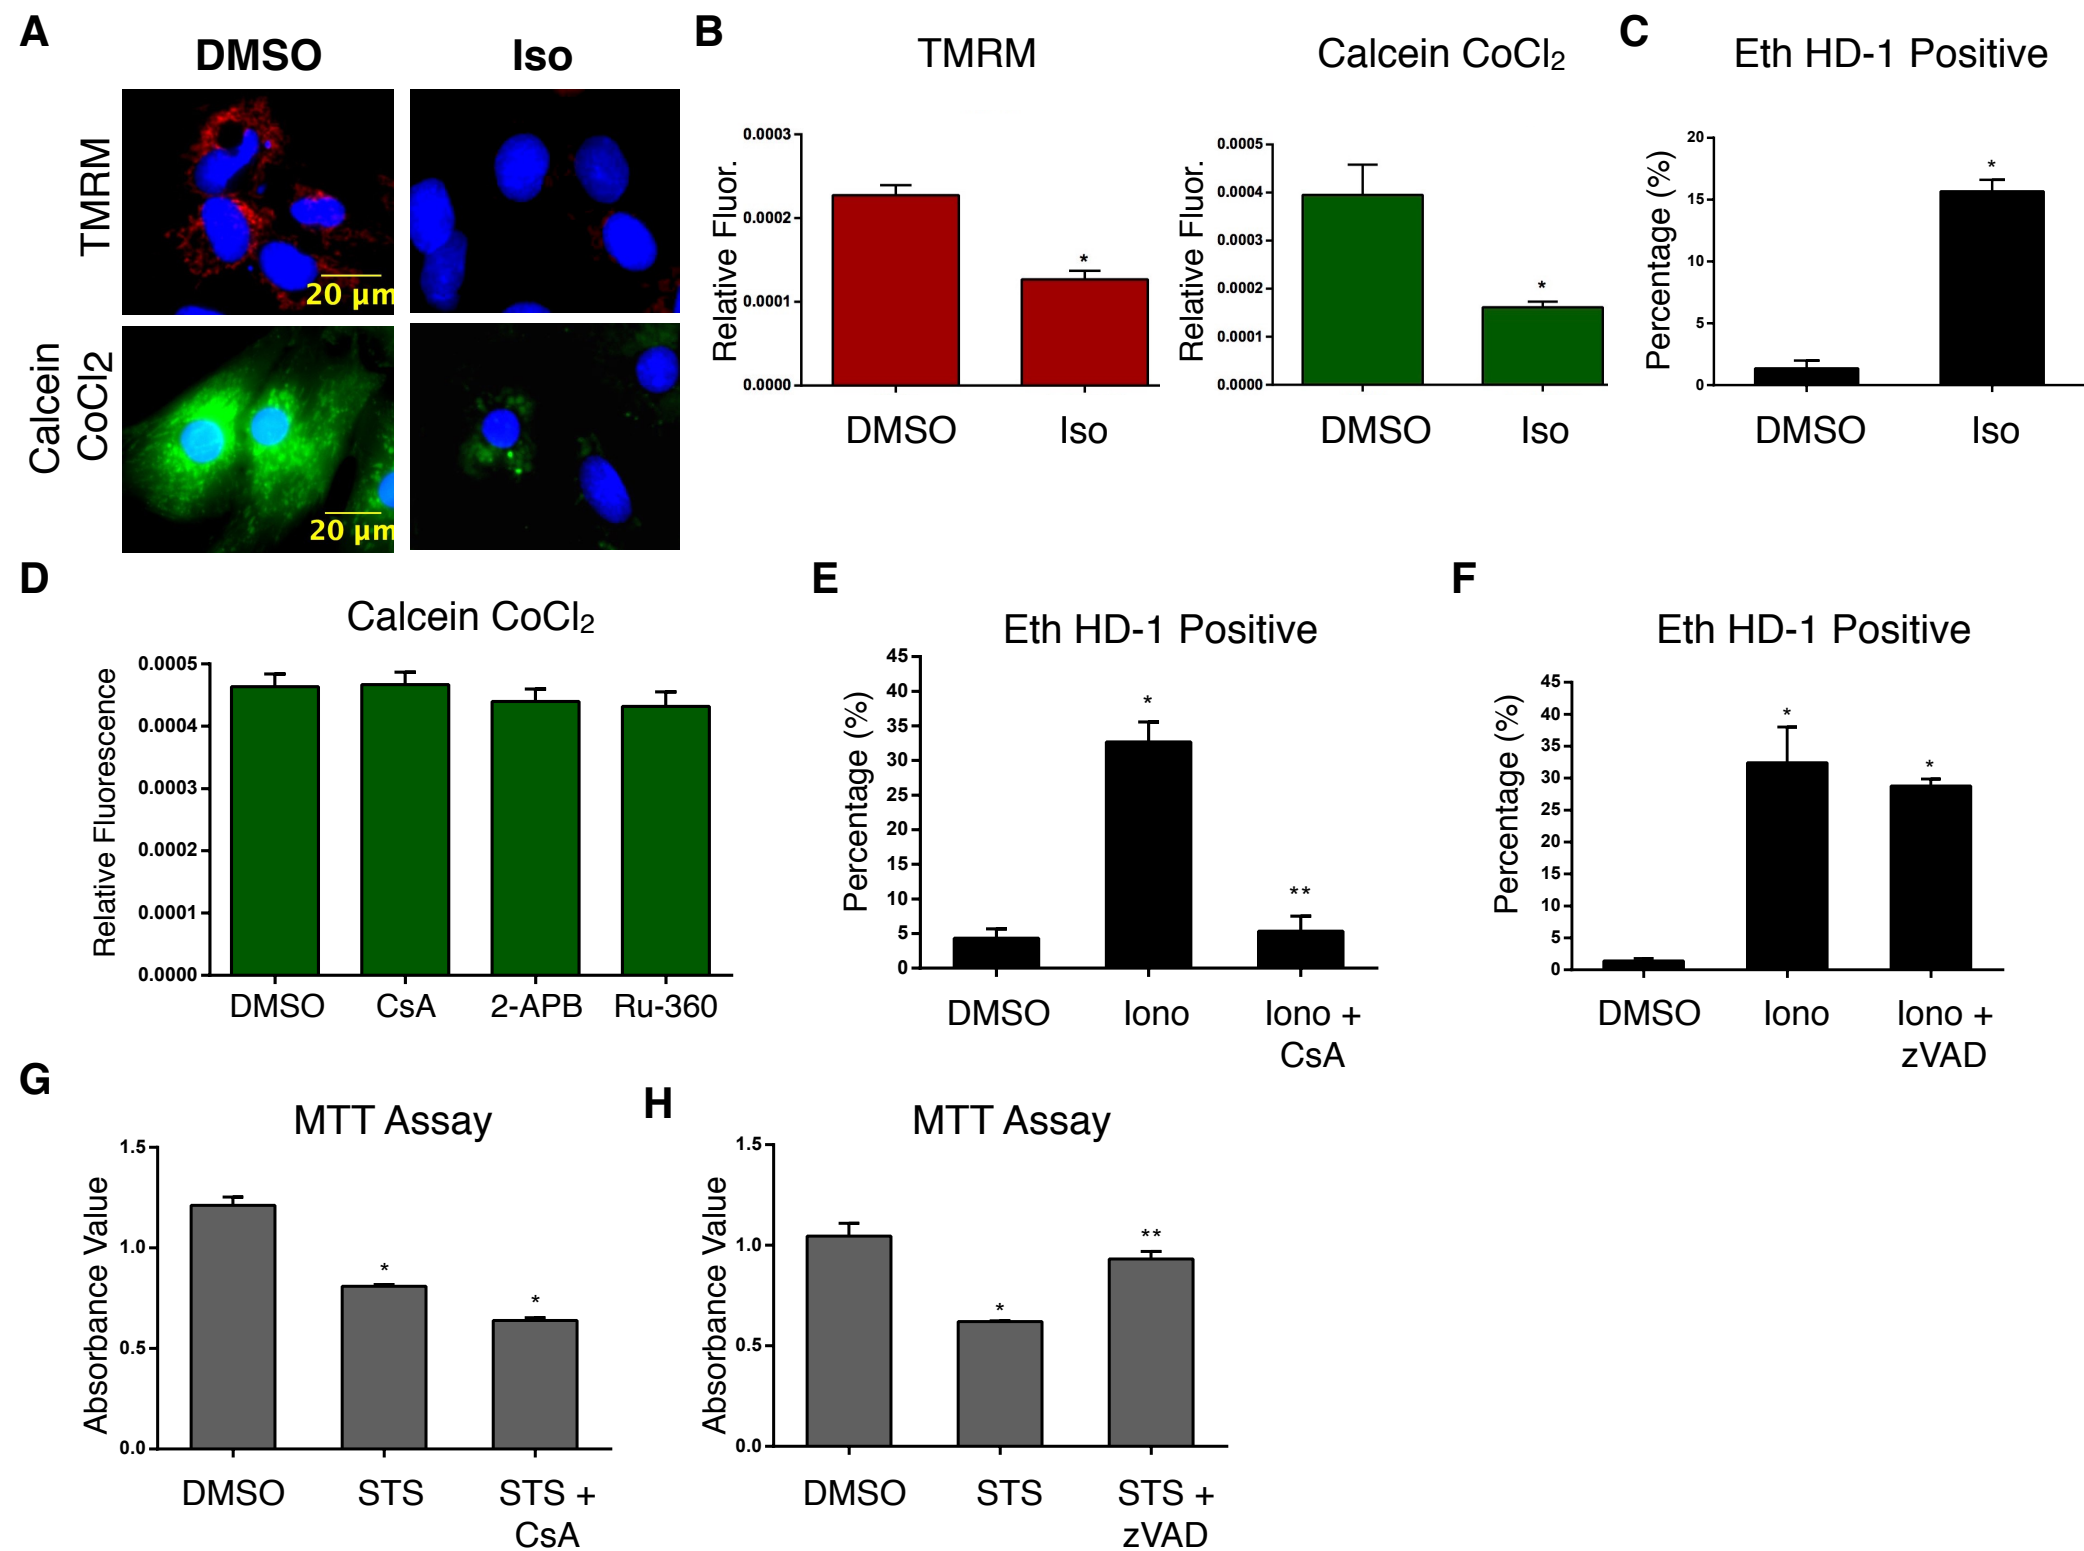

Supplement: 41418_2018_73_MOESM1_ESM.pdf [file 41418_2018_73_MOESM1_ESM.pdf]

Figure S2

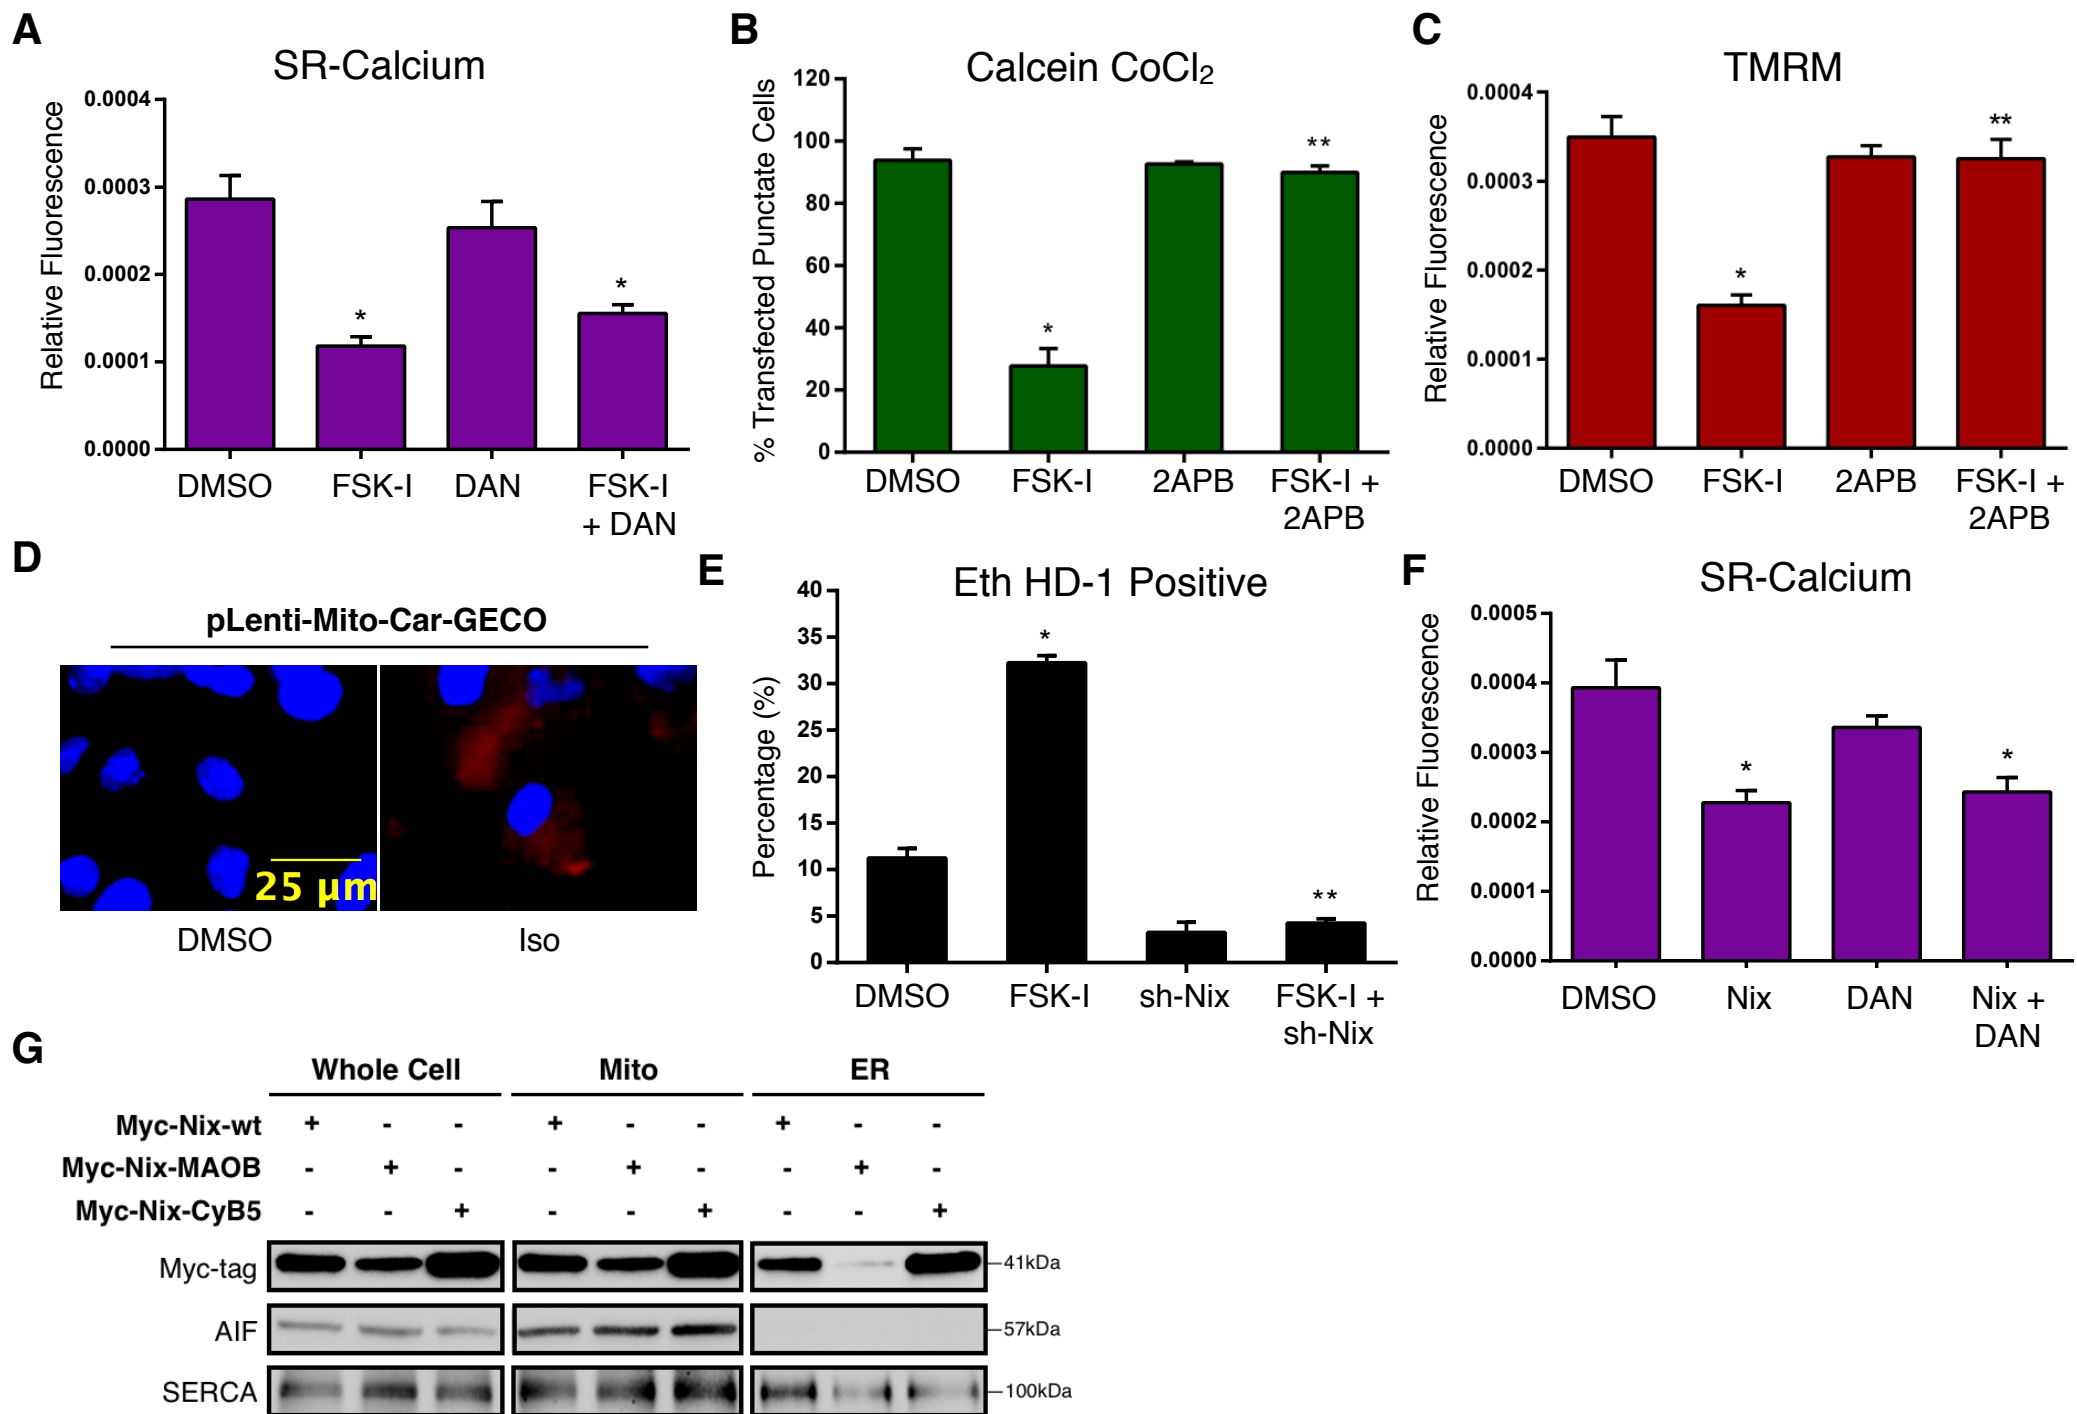

Supplement: 41418_2018_73_MOESM2_ESM.pdf [file 41418_2018_73_MOESM2_ESM.pdf]
